25 demonstrated that females, persons who used public transportation, persons who have longer  
26 commute times and persons who are less satisfied with the commute infrastructure are more  
27 likely to report that they experience symptoms associated with stress while engaged in the  
28 daily commute compared to males, persons who use private transportation, persons who have  
29 shorter commute times and persons who are more satisfied with the commute infrastructure  
30 respectively. Once all controlled variables were accounted for, it appears that for this study  
31 population, age, where they live and whether or not they actively or passively commuted did  
32 not have any meaningful impact on whether they would report if they experienced stress  
33 associated symptoms while engaged in the daily commute. he results suggest the need for a  
34 multi-pronged approach to address commuting stress, involving individual healthcare,  
35 mental-health-centric urban transport design, improved commute infrastructure, and  
36 increased employer engagement. Future studies employing qualitative and experimental  
37 methods are recommended.

38

39 **Keywords:** Stress, Commute, Urbanization, Daily hassles, Mental Health

40

## 41 **Introduction**

42 The majority of contemporary urbanisation, a complex social and economic process that  
43 occurs through various forms of urban growth and expansion drastically altering the social  
44 and physical environment in which people live and operate, is occurring in low and middle  
45 income countries(LMICS).[1,2] Not surprisingly these changes can have a significant impact  
46 on both physical and mental health on urban inhabitants.[3-5] Increased access to modern  
47 technology in the urban environment has induced a fast-paced life which is also characterised  
48 by a heavy workload, fast paced lifestyle, communication, quick decisions, multitasking,  
49 pressure to be active on social media, and high mobility, all of which have a direct impact on

50 people's health [6,7] however for the purposes of this paper, there is going to be an exclusive  
51 focus on high mobility.

52

53 The majority of mobility in the urban environment consists of the daily commute which appears  
54 to be intensifying in both the developed and developing world. This intensification is a result  
55 of an increase in both the frequency and length/duration of commutes to work.[8,9] There is a  
56 significant body of literature that examines how the increased intensity of commuting *to* and  
57 *from* work can have detrimental effects on health. Impacts of lengthy commutes include an  
58 increased incidence of respiratory illnesses, muscular injuries, and reduced physical activity  
59 along with the associated undesirable health outcomes.[10-14] Additionally, an emerging body  
60 of scholarship reveals that a lengthy commute to workplaces is also associated with poor mental  
61 health which may be expressed as stress.[15-19] The commute is more often than not a daily  
62 activity, thus if it is stressful, a person may be placed under stress on an ongoing basis.

63

64 Stress is the physiological and psychological response to a situation that a person has perceived  
65 to be negative and has made a determination that they do not have the resources to address the  
66 problem, accounting for all other factors.[20-22] In addition to being an indicator of poor  
67 mental health, chronic exposure to stress is also associated with many chronic non-  
68 communicable diseases (CNCDs) including but not limited to diabetes, cardiovascular and  
69 cerebrovascular pathologies, chronic obstructive pulmonary disease, and malignant  
70 neoplasms.[23] CNCDs continue to be a significant public health concern globally, accounting  
71 for most of the reported global mortality and morbidity with the global burden rapidly shifting  
72 towards the LMICs.[24-26] Furthermore, long-term exposure to stress is more likely to be in a  
73 state of constant anger and irritability, leading to strained personal relationships which can

74 further lead to to potential isolation, anxiety, and depression. If it is severe enough, it may even  
75 lead to suicide.[27-29]

76

77 The question therefore becomes who is more likely to experience commuter stress and there  
78 have been a few studies that attempted to examine these factors. For example, women are more  
79 likely to experience commuter stress than men.[30-34] Similarly, active commuters are less  
80 likely to experience stress than passive commuters.[35-37] The issue however with the majority  
81 of these studies either examined only the intrinsic factors (factors related to the commuter) or  
82 the extrinsic factors (factors related to the commute process). Also, almost all of the previous  
83 studies were conducted in economies that were considered fully urbanised (that is, more than  
84 50% of their population live in urban agglomerations) and there has been a dearth of studies  
85 that examined this issue in economies that are in transition to urbanisation. Also, the majority  
86 of previous studies used only Likert or binary scales to examine stress experienced during the  
87 commute. They did not focus on the physical and psychological symptoms of stress. In order  
88 to address the preceding gaps identified, this paper aims to to identify what factors (both  
89 extrinsic and intrinsic) are associated with experiencing stress while engaged in the daily  
90 commute using in an emerging economy that has less than 50% of its population living in an  
91 urban environment using symptomatology to measure commuting stress.

92

93 The next section of this paper detailed the methods This is followed by the presentation of the  
94 results which consists of the presentation of the sample characteristics, the individual risk factor  
95 assessment and regression models that include all of the factors that were tested. These results  
96 and the implications with respect to the literature are then discussed in the next section after  
97 which some final conclusions along with some recommendations are made.

98

## 99 **Method**

### 100 **Study design and setting**

101 This observational cross-sectional study was conducted in Georgetown, the capital city of  
102 Guyana, between March 1st to April 30th, 2023. As the country's political and economic  
103 centre, it serves as a critical hub for administrative, commercial, and cultural activities. While  
104 the reliable data on the population of Georgetown is limited, the National Census of 2012 puts  
105 its population to be around 120,000 people.

106

### 107 **Study Participants**

108 Participants were drawn from among employees at the University and the University's affiliate  
109 partners. The University of Guyana serves as the National University of Guyana and has just  
110 about 8,000 students and employs about 1,000 teaching and non-teaching staff. Universities  
111 are normally microcosms of the wider society in which they operate, therefore it is to be  
112 expected that the demographic makeup of the university would be similar to that of the society  
113 in which they function.[\[38-39\]](#)

114

115 Using an online sample size calculator, (Raofost, 2004), assuming an unknown population a  
116 sample size of 377 was recommended. Assuming that all questionnaires would not be returned  
117 or only partially completed, it was determined that 33% more questionnaires should be  
118 distributed therefore 505 questionnaires were distributed. To be included in the study,  
119 participants must work in Georgetown for at least 30 hours per week at an in person job. The  
120 participant must also be at least 18 years of age and have worked on the job for at least 6  
121 months.

122

123 Convenience sampling was used until the desired sample size was achieved. Employees would  
124 be approached and given a short presentation about the rationale, objectives, and significance  
125 of the study along with guarantees that no identifiable information will be collected and that  
126 all information collected would remain confidential. After the employee gave their verbal  
127 consent to participate in the study, each employee was informed that there were three different  
128 ways to participate in the study: a shared link, a tablet with the questionnaire on it, or a physical  
129 paper questionnaire and it was for them to choose the method that they were most comfortable  
130 with. Once a choice was made, the 83-item questionnaire was made available using the medium  
131 of their choice, and the employee was thanked for their time.

132

## 133 **Variables**

134 The dependent variable commuting stress was evaluated using symptomatology. This was done  
135 by asking participants to report the frequency in which they experienced a variety of symptoms  
136 associated with stress while engaged in the daily commute. These included physical symptoms  
137 such as muscle pain, headaches, nausea, difficulty breathing, fatigue, chest pain, indigestion,  
138 dizziness, sweating and constipation/diarrhoea and psychological symptoms such as feeling  
139 irritable, overwhelmed, anxious, having uncontrollable thoughts, depressed, a sense of dread,  
140 lonely, pressured, and distressed. For each symptom, they were asked whether it was  
141 experienced very often, fairly often, sometimes, almost never, or never. Based on the response  
142 a score was assigned to each symptom with very often=4 and never=1. A total commuting  
143 stress score was then generated.

144

145 The independent variables aimed to assess personal (intrinsic) factors, commute specific  
146 factors, and built environment factors. The demographic factors which were tested include age,  
147 sex, place of residence (whether they lived in the city or the suburbs), and hours of work per

148 day. Other intrinsic factor included was the perceived quality of sleep which was measured on  
149 a five-point Likert scale, the general life stress which was measured using the Cohen's  
150 Perceived Stress Scale (PSS-10), and how hassled a person perceived their job to be, which  
151 was measured using a sub-scale of the Daily Hassles and Mood Questionnaire (DHMQ). The  
152 DHMQ is a self-report measure developed by Dr. Thomas W. Kamarck and his colleagues in  
153 1991, which assesses the daily hassles, mood, and health status of individuals. The job sub-  
154 scale consists of seven questions that aimed to elicit how people felt about their fellow workers,  
155 their supervisors, and their workload. It was scored from 0-21. Higher scores were associated  
156 with negative feelings about the job. The DHMQ has been found to be a valid and reliable  
157 measure, with high levels of internal consistency and test-retest reliability. It has been used in  
158 various populations, including healthy adults, medical patients, and college students. The scale  
159 has been found to be positively associated with a variety of health outcomes, such as  
160 cardiovascular disease, hypertension, and depression.[40-42] The Perceived Life Stress  
161 measured by Cohen's Perceived Stress Scale (PSS-10) is another independent variable. The  
162 PSS-10 is a 10-item version of the scale, which was developed by Sheldon Cohen and his  
163 colleagues in 1983. The scale assesses the extent to which respondents find their lives  
164 unpredictable, uncontrollable, and overloaded in the last month. Respondents are asked to rate  
165 the degree to which they agree with each statement on a 5-point Likert scale, where 0 = never  
166 and 4 = very often. The PSS-10 has been found to be a valid and reliable measure of perceived  
167 stress, with high levels of internal consistency and test-retest reliability. In addition, the scale  
168 has been validated in various populations including, but not limited to, healthy adults, medical  
169 patients, and college students. It has been found to be positively associated with a variety of  
170 health outcomes, including cardiovascular disease, hypertension, and depression.[43-45]  
171

172 The participants' coping capabilities were the third mediating variable that was tested using  
173 the Brief Resilient Coping Scale (BRCS). This is a 4-item unidimensional scale that is  
174 designed to capture tendencies to cope with stress in a highly adaptive manner. The scale  
175 ranges from 0-20 and the higher the score, the greater the coping capabilities of the person  
176 This instrument has also been successfully subjected to multiple reliability and validity  
177 evaluations.[\[46-48\]](#)

178

179 Resiliency refers to the ability to adapt despite encountering less-than-ideal circumstances.  
180 This was measured by using the Brief Resilience Scale (BRS) which is a 6-point  
181 unidimensional scale that does not take into account external factors. [\[49\]](#) A person who is  
182 resilient tends to demonstrate high levels of emotional stability, self-efficacy, and sociability  
183 and thus better able to handle life stresses. The BRS score ranges from 1-5 with the higher  
184 values indicating higher levels of resilience. Like the BCRS, the BRS was also subject to  
185 multiple reliability and validity testing. [\[50-52\]](#)

186

187 The first commute-specific factors which were tested were the method of commuting whether  
188 it was active or passive, or where commuting was done by public or private means. The second  
189 commute-specific factor that was tested was the length of the commute. The study used 5-point  
190 Likert Scale questions to assess commuters' satisfaction with various built environment factors.  
191 These factors included greenery along the route, frequency of traffic congestion, and road-use  
192 compliance by others. Additionally, satisfaction with transportation infrastructure was gauged  
193 through multiple aspects like road conditions, street lighting, and public transport. A composite  
194 score ranging from 9-45 was generated, with higher scores indicating greater satisfaction.

195



## 196 **Data analysis**

197 All data were analysed using Stata Version 17.0. Descriptive analysis was performed on all  
198 variables. Non numerical data was converted to binary. For gender, males were assigned a  
199 value of 0 and females a value of 1. Those who lived in the city were assigned a value of 1  
200 while those who lived in the suburbs were assigned a value of 0. Persons who used active and  
201 private commute modes were assigned a value of 0 while persons who used active and public  
202 forms of transportation were assigned a value of 1. Regression analysis was conducted. All  
203 values are reported with a 95% confidence interval. A *p*-value of less than 0.05 was considered  
204 to be statistically significant.

205

## 206 **Ethical Issues**

207 For each participant, the purpose of the study was explained. They were informed that  
208 participation in this study was completely voluntary and that there were no consequences  
209 whether good or bad if they chose to participate in the study. They were also informed that they  
210 do not have to answer any question they feel uncomfortable about asking and they can chose  
211 to terminate their participation in the study at any point. Participants were also informed that  
212 no personally identifying data will be collected and therefore there was no way to trace a  
213 particular submission to any one participant. This information was repeated on the cover of the  
214 questionnaire that was provided. The first question of the questionnaire asked whether or not  
215 they agreed to participate in the study.

216 This study was approved by the Institutional Review Board of Arizona State University.  
217 (Protocol number: STUDY00017507)

218

## 219 Results

220 Out of 505 questionnaires initially distributed, several were excluded from the final analysis  
221 for various reasons: 22 had over 10% of questions unanswered; 24 were completed by  
222 individuals working fewer than 30 hours per week; 2 were filled out by minors under the age  
223 of 18; 29 were from respondents who neither worked or lived in the study area; and 1 came  
224 from a remote worker. This left 427 valid questionnaires for final analysis. These participants  
225 were relatively diverse with respect to gender, age, relationship status, ethnicity, religious  
226 affiliation, educational levels, length of commute, total life stress levels and where they resided.  
227 Table 1 shows the nominal characteristics of the participants included in the final analysis while  
228 table 2 provides a summary of the numerical characteristics.

229

230 **Table 1: Summary of nominal characteristics of study participants (n=427)**

231

232

| Parameter                  | Number (%) |
|----------------------------|------------|
| <b>Gender</b>              |            |
| Male                       | 100 (25.6) |
| Female                     | 317 (74.4) |
| <b>Relationship status</b> |            |
| Committed Relationship     | 205 (48.2) |
| Single                     | 187 (44.1) |
| No response                | 35 (8.2)   |

|                                      |            |
|--------------------------------------|------------|
| <b>Income level</b>                  |            |
| Low income                           | 280 (65.5) |
| High and middle income               | 147 (34.5) |
| <b>Ethnicity</b>                     |            |
| Indigenous                           | 3 (0.7)    |
| African Guyanese                     | 153 (36.0) |
| East Indian Guyanese                 | 121 (28.5) |
| Mixed descent                        | 148 (34.8) |
| No Response                          | 2 (0.5)    |
| <b>Religious affiliation</b>         |            |
| Christian                            | 311 (73.3) |
| Hindu                                | 64 (15.1)  |
| Muslim                               | 29 (6.8)   |
| Other/ Non-affiliated                | 23 (5.4)   |
| <b>Educational Level Completed</b>   |            |
| Tertiary                             | 363 (85.2) |
| Non-Tertiary                         | 64 (14.8)  |
| <b>Residence</b>                     |            |
| In Georgetown (main city)            | 149 (38.8) |
| Outside of Georgetown                | 278 (61.2) |
| <b>Commute Mode (Private/Public)</b> |            |
| Private                              | 240 (56.2) |

|                     |            |
|---------------------|------------|
| Public              | 187 (43.8) |
| <b>Commute Mode</b> |            |
| Active              | 23 (5.4)   |
| Non-Active          | 404 (94.6) |

233

234 **Table 2: Summary of numerical characteristics of study participants (n=427)**

235

236

| Parameter                          | Range | Mean  | Standard Deviation |
|------------------------------------|-------|-------|--------------------|
| Age                                | 0-65  | 29.62 | 8.66               |
| Perceived Stress Score (0-40)      | 0-37  | 19.03 | 6.97               |
| Length of Commute (min)            | 5-165 | 39.20 | 25.67              |
| Basic Coping Score (4-20)          | 4-20  | 15.08 | 3.04               |
| Resiliency (1-5)                   | 1-5   | 3.39  | 0.75               |
| Job Perception (0-21)              | 0-21  | 7.47  | 7.45               |
| Infrastructure Satisfaction (9-45) | 9-45  | 21.37 | 7.53               |
| Commute Stress Score (0-88)        | 1-88  | 36.77 | 16.01              |

237

238 The three most frequently reported symptoms associated with stress while engaged in the

239 daily commute are complaints about feeling fatigued, excessive sweating and feeling hassled.

240 The four least commonly reported symptoms are feelings of indigestion, chest pains,  
241 dizziness and bowel dysfunction. Figure 1 shows the distribution of all the symptoms  
242 examined in this study.

243

244 **Table 3: Effect of intrinsic and extrinsic factors on commuting stress score**

245

| Commuting<br>Stress               | Coef. | St.Err. | t-value | p-<br>value | [95% Conf<br>Interval] | Sig |
|-----------------------------------|-------|---------|---------|-------------|------------------------|-----|
| Female                            | 4.606 | 1.614   | 2.85    | .005        | 1.432<br>7.781         | *** |
| Age                               | .053  | .092    | 0.58    | .564        | -.127<br>.233          |     |
| Lives outside<br>of<br>Georgetown | -.957 | 1.505   | -0.64   | .525        | -3.917<br>2.003        |     |
| Non-Active<br>commute             | 3.265 | 3.243   | 1.01    | .315        | -3.113<br>9.644        |     |

|                                                |        |       |       |      |        |        |     |
|------------------------------------------------|--------|-------|-------|------|--------|--------|-----|
| Public<br>commute                              | 3.803  | 1.48  | 2.57  | .011 | .892   | 6.713  | **  |
| Time for<br>commute<br>(min)                   | .059   | .03   | 1.97  | .049 | 0      | .117   | **  |
| Satisfaction<br>with commute<br>infrastructure | -.277  | .095  | -2.90 | .004 | -.465  | -.089  | *** |
| Resilience                                     | -3.261 | 1.085 | -3.01 | .003 | -5.395 | -1.127 | *** |
| Coping                                         | .576   | .264  | 2.18  | .03  | .056   | 1.096  | **  |
| Satisfaction<br>with job                       | 4.557  | 1.677 | 2.72  | .007 | 1.257  | 7.856  | *** |
| Total life<br>stress                           | .917   | .114  | 8.05  | 0    | .693   | 1.14   | *** |

|                          |        |          |                      |      |        |          |
|--------------------------|--------|----------|----------------------|------|--------|----------|
| Low income               | 1.68   | 1.392    | 1.21                 | .228 | -1.057 | 4.418    |
| Non tertiary<br>educated | -2.026 | 1.911    | -1.06                | .29  | -5.784 | 1.733    |
| Constant                 | 11.309 | 7.62     | 1.48                 | .139 | -3.679 | 26.297   |
| <hr/>                    |        |          |                      |      |        |          |
| Mean dependent var       |        | 34.441   | SD dependent var     |      |        | 15.997   |
| R-squared                |        | 0.409    | Number of obs        |      |        | 363      |
| F-test                   |        | 18.551   | Prob > F             |      |        | 0.000    |
| Akaike crit. (AIC)       |        | 2879.231 | Bayesian crit. (BIC) |      |        | 2933.753 |

\*\*\*  $p < .01$ , \*\*  $p < .05$ , \*  $p < .1$

246 The results in Table 3 shows that after controlling for resilience, coping, perceived life stress,  
 247 satisfaction with job, income levels and educational attainment, commuting stress levels  
 248 measured using symptomatology were significantly higher in females, persons who used  
 249 public means of transportation, persons with longer commute times and persons who were

250 not satisfied with commute infrastructure. Age and location of residence appear to have no  
251 effect on the level of commuting stress as measured using symptomatology.

252

## 253 **Discussion**

254 The main aim of this paper was to determine what factors were associated with experiencing  
255 commuter stress during the daily commute using symptomatology. After controlling for  
256 resiliency, coping, perception of job, total life stress, income levels and education all of which  
257 can contribute to how persons perceive hassles in their lives, the regression model  
258 demonstrated that females, persons who used public transportation, persons who have longer  
259 commute times and persons who are less satisfied with the commute infrastructure are more  
260 likely to report that they experience symptoms associated with stress while engaged in the daily  
261 commute compared to males, persons who use private transportation, persons who have shorter  
262 commute times and persons who are more satisfied with the commute infrastructure  
263 respectively. Once all controlled variables were accounted for, it appears that for this study  
264 population, age, where they live and whether or not they actively or passively commuted did  
265 not have any meaningful impact on whether they would report if they experienced stress  
266 associated symptoms while engaged in the daily commute. These findings are for the most part  
267 consistent with what is already published in the literature that used alternative methods of  
268 measuring commuting stress. In the present study, the non-association that was found between  
269 the active/non-active commuting and commuting stress was discordant with previous studies,  
270 however this could be explained due to sampling inefficiencies which resulted in the majority  
271 of the sample being users of non-active commuting modes.

272



273 The findings of this study are limited to persons who are employed with the University of  
274 Guyana or one of its affiliate organisations/institutions for at least 6 months and have to  
275 commute to work on a daily basis. Despite these limitations however, the findings of this study  
276 add to the existing knowledge in a few ways. Firstly, this appears to be the first time an attempt  
277 was made to examine all of the factors (both the intrinsic and extrinsic) that could potentially  
278 contribute to commuting stress in a single study. Previous research tended to only focus on a  
279 few of the factors and there was very little consistency across studies as to how commuting  
280 stress should be measured. Secondly, for the most part, commuting stress has been measured  
281 either by using electrodermal activity or a single Likert-point scale, however, this study used  
282 symptomatology. The only other study that used symptomology to assess commuting stress  
283 was conducted by Rezapour et al., (2021), however, the focus was narrow with respect to both  
284 the factors examined and the symptoms used when compared to the present study. Further,  
285 Rezaour treated each symptom as an individual outcome whereas in the present study, all of  
286 the symptoms were reduced to a single value that factored in any positive emotions that may  
287 occur on the daily commute to give a more holistic view of the stress experienced on the daily  
288 commute. The third way in which this paper contributes to the literature is the fact that  
289 symptomology could now potentially be used as an alternative method for measuring  
290 commuting stress as the findings of this study for the most part replicate that of what exists in  
291 the available literature. Furthermore, in doing so, this study strengthens the findings in the  
292 previously published studies as the findings are similar even when using a different method to  
293 measure the outcome variables. The fourth way in which this study contributes to the existing  
294 literature is that it expands the list of factors that can be considered when thinking about  
295 commuting stress. The two novel factors that emerged in this study are people's perception of  
296 their jobs, their satisfaction with the commute infrastructure in place, and whether or not they  
297 commute via public or private means. The fifth and final way in which this paper contributes

298 to the literature is that it adds to the geographical diversity in which this issue was examined.  
299 A cursory review of previous papers would reveal that the studies which have examined this  
300 issue have been skewed towards North America, Europe and Asia, where there has been heavy  
301 investment in public transportation, with little to no studies emanating from South and Central  
302 America, the Caribbean and Africa. Furthermore, the majority of studies that are available were  
303 conducted in economies that have completed the urban transition, that is more than 50% of  
304 their total population lives in urban areas. At the time of data collection, Guyana, located in  
305 South America is an economy in transition with less than 50% of its population living in urban  
306 agglomerations.

307

## 308 **Conclusions**

309 We found that both the intrinsic and the extrinsic factors interact in complex ways to influence  
310 the overall stress experienced during commuting. Understanding these can help in designing  
311 interventions to make commuting a less stressful experience, whether it involves improving  
312 public transit systems, encouraging flexible work arrangements, or promoting stress  
313 management strategies for individuals. Interventions such as these can significantly reduce their  
314 exposure to stress which stands as an independent risk factor for CNCs that continues to  
315 plague both the developed and developing world. As a policy response following three  
316 measures can be implemented. First, at a personal level, health care providers could be provided  
317 with some tools that they can use on their own to reduce stressful situations. For example, one  
318 could provide mindfulness - often used as a therapeutic technique to manage stress and promote  
319 mental wellbeing. It is a practice that involves focusing one's awareness on the present moment,  
320 while calmly acknowledging and accepting one's feelings, thoughts, and bodily sensations. [53-  
321 54]

322

323 The second, establishment of guidelines to ensure that the infrastructure that is being used by  
324 commuters is mentally friendly, refers to physical infrastructure designed and constructed with  
325 an understanding of the psychological and emotional impact it has on individuals who interact  
326 with it. It aims to create an environment that promotes mental well-being and reduces stress  
327 levels. City planners and transportation officials can create an infrastructure that supports mental  
328 well-being and reduces the stress associated with commuting. In the long run, mentally friendly  
329 infrastructure can contribute to happier, healthier, and more productive communities. This will  
330 require high-level interventions as there may be a need to make the public transportation system  
331 less chaotic, ensure that there is more greenery along major thoroughfares, and just simply  
332 ensure that the commuting infrastructure such as roads and footpaths are maintained.

333 The third and final way that is proposed to reduce the stress on the daily commute for  
334 organisations is to ensure that their employees are meaningfully engaged. An employee who is  
335 meaningfully engaged at work is deeply connected and committed to their role, their team, and  
336 their organisation. They find their work fulfilling and significant, feel that they are making a  
337 valuable contribution, and are motivated to do their best. To foster meaningful engagement,  
338 organisations need to provide supportive leadership, opportunities for growth and development,  
339 a positive work environment, and recognition for contributions and achievements. While  
340 everyone's circumstances are different, and a range of factors can influence commute-related  
341 stress, a positive relationship with their work and their workplace can indeed help mitigate stress  
342 during their commute. For example, when employees find meaning in their work and feel valued  
343 in their roles, they may experience less anxiety about workplace challenges or pressures. This  
344 positive mindset can extend to their commute, making them less stressed about potential delays  
345 or complications on their way to work. Similarly, employees who are empowered to manage their  
346 workloads effectively may have more flexible schedules, allowing them to avoid peak commuting  
347 times or opt for less stressful modes of transport. In an organisation that nurtures meaningful

348 engagement, the employee is likely to handle commuting stresses more effectively, viewing them  
349 as minor inconveniences which can contribute to an overall reduction in stress, both within and  
350 outside of work

351

## 352 **Reference**

- 353 1. Zeng, C., Liu, Y., Liu, Y., & Qiu, L. Urban Sprawl and Related  
354 Problems : Bibliometric Analysis and Refined Analysis from  
355 1991 to 2011. *Chinese Geographical Science*, 2014, 24(2), 245–257
- 356 2. United Nations, Department of Economic and Social Affairs, Population Division  
357 2019. World Urbanization Prospects: The 2018 Revision (ST/ESA/SER.A/420). New  
358 York: United Nations, 2019
- 359 3. Aliyu, A. A., & Amadu, L. Urbanization, cities, and health: the challenges to  
360 Nigeria—a review. *Annals of African medicine*, 2017, 16(4), 149.
- 361 4. Li, X., Song, J., Lin, T., Dixon, J., Zhang, G., & Ye, H. Urbanization and health in  
362 China, thinking at the national, local and individual levels. *Environmental Health*,  
363 2016, 15, 113-123
- 364 5. Eckert, S., & Kohler, S. Urbanization and health in developing countries: a systematic  
365 review. *World Health Popul*, 2014, 15(1), 7-20.
- 366 6. Lippke, S., Schalk, T. M., Kühnen, U., & Shang, B. Pace of life and perceived stress  
367 in international students. *PsyCh Journal*, 2021, 10(3), 425-436.
- 368 7. Qidwai, W., Khushk, I. A., Shamim, U., Altaf, S., Hadi, H., & Nanji, K. Fast pace of  
369 life and its impact on health: results of a study from the largest city of Pakistan.  
370 *Pakistan journal of public health*, 2016, 6(4), 10-16.

- 371 8. Sultana, & Weber, J. The Nature of Urban Growth and the Commuting Transition:  
372 Endless Sprawl or a Growth Wave? *Urban Studies*, 2014, 51(3):544–576.
- 373 9. Travisi, Camagni, R., & Nijkamp, P. Impacts of urban sprawl and commuting: A  
374 modelling study for Italy. *Journal of Transport Geography*, 2010, 18:383–392.
- 375 10. Ali, M., Ahsan, G. U., Uddin, Z., & Hossain, A. Road traffic delays in commuting  
376 workplace and musculoskeletal health among sedentary workers: a cross-sectional  
377 study in Dhaka city. *Journal of occupational health*, 2021, 63(1), e12289.
- 378 11. Kuenn. A. Does Commuting Affect Health? *Health Economics*, 2016, 25(8):984–  
379 1004
- 380 12. Ramos, C. A., Wolterbeek, H. T., & Almeida, S. M. Air pollutant exposure and  
381 inhaled dose during urban commuting: a comparison between cycling and motorized  
382 modes. *Air Quality, Atmosphere & Health*, 2016, 9, 867-879.
- 383 13. Raza, A., Pulakka, A., Hanson, L. L. M., Westerlund, H., & Halonen, J. I. Commuting  
384 distance and behavior-related health: a longitudinal study. *Preventive Medicine*, 2021,  
385 150, 106665.
- 386 14. Wu, D. L., Lin, M., Chan, C. Y., Li, W. Z., Tao, J., Li, Y. P., ... & Bu, C. W.  
387 Influences of commuting mode, air conditioning mode and meteorological parameters  
388 on fine particle (PM<sub>2.5</sub>) exposure levels in traffic microenvironments. *Aerosol and*  
389 *Air Quality Research*, 2013, 13(2), 709-720.
- 390 15. Karan, M., Rahal, D., Almeida, D. M., Bower, J. E., Irwin, M. R., McCreath, H.,  
391 Seeman, T., & Fuligni, A. J. School commute time, chronotype, and altered HPA axis  
392 functioning during adolescence. *Psychoneuroendocrinology*, 2021, 133, 105371–  
393 105371

- 394 16. Lucas, & Heady, R. B. Flextime Commuters and Their Driver Stress, Feelings of  
395 Time Urgency, and Commute Satisfaction. *Journal of Business and Psychology*,  
396 2002, 16(4), 565–571
- 397 17. Rosida, I., Sari, D. W., & Irjayanti, A. D. The Mode Choices And Commuting Stress:  
398 Empirical Evidence From Jakarta And Denpasar. *Jurnal Pengembangan Kota*, 2019,  
399 7(1), 68–76.
- 400 18. Rüger, H., Pfaff, S., Weishaar, H., & Wiernik, B. M. Does perceived stress mediate  
401 the relationship between commuting and health-related quality of life? *Transportation*  
402 *Research Part F: Traffic Psychology and Behavior*, 2017, 50, 100–108.
- 403 19. van Hooff. The Daily Commute from Work to Home: Examining Employees’  
404 Experiences in Relation to Their Recovery Status. *Stress and Health*, 2015, 31(2),  
405 124–137.
- 406 20. Hulbert, W. N. J., Morrison, V., Wilkinson, C., & Neal, R. D. Investigating the  
407 cognitive precursors of emotional response to cancer stress: Re-testing Lazarus’s  
408 transactional model. *British Journal of Health Psychology*, 2013, 18(1), 97–121.
- 409 21. Lazarus R. S., Folkman S. *Stress, appraisal, and coping*. Springer Publishing  
410 Company, 1984
- 411 22. Wang, F., Pan, F., Shapiro, L. A., & Huang, J. H. Stress Induced Neuroplasticity and  
412 Mental Disorders 2018. *Neural Plasticity*, 2018, 2018:5382537.
- 413 23. Payne, J. K. State of the Science: Stress, Inflammation, and Cancer. *Oncology*  
414 *Nursing Forum*, 2014, 41(5):533–540.
- 415 24. Shobeiri, Aali, A., Khan, I. A., Khan, M. A. ., Kim, M. S., et al. Global burden of  
416 chronic respiratory diseases and risk factors, 1990–2019: an update from the Global  
417 Burden of Disease Study 2019. *EClinicalMedicine*, 2023, 59, 101936–101936.

- 418 25. Simpson, & Camorlinga, S. G. A Framework to Study the Emergence of Non-  
419 Communicable Diseases. *Procedia Computer Science*, 2017, 114, 116–125
- 420 26. Sommer, Griebler, U., Mahlknecht, P., Thaler, K., Bouskill, K., Gartlehner, G., &  
421 Mendis, S. Socioeconomic inequalities in non-communicable diseases and their risk  
422 factors: an overview of systematic reviews. *BMC Public Health*, 2015, 15(1), 914–  
423 914
- 424 27. Asarnow, Goldston, D. B., Tunno, A. M., Inscoc, A. B., & Pynoos, R. Suicide, Self-  
425 Harm, & Traumatic Stress Exposure: A Trauma-Informed Approach to the Evaluation  
426 and Management of Suicide Risk. *Evidence-Based Practice in Child and Adolescent*  
427 *Mental Health*, 2020, 5(4), 483–500.
- 428 28. Heidari, M., Ghodusi Borujeni, M., Kabirian Abyaneh, S., & Rezaei, P. The Effect of  
429 Spiritual Care on Perceived Stress and Mental Health Among the Elderlies Living in  
430 Nursing Home. *Journal of Religion and Health*, 2019, 58(4):1328–1339.
- 431 29. Kim, Jeon, S.-W., Cho, S. J., Shin, Y. C., & Park, J.-H. Comparison of the factors for  
432 suicidal ideation and suicide attempt: a comprehensive examination of stress, view of  
433 life, mental health, and alcohol use. *Asian Journal of Psychiatry*, 2021, 65, 102844
- 434 30. Jahangeer, S. M. A., Hasnain, N., Tariq, M. T., Jamil, A., Zia, S. Y., & Amir, W. .  
435 Frequency and Association of Stress Levels with Modes of Commuting Among  
436 Medical Students of a Developing Country. *The Malaysian Journal of Medical*  
437 *Sciences*, 2021, 28(4), 113–122
- 438 31. Magaña, P, Roberto, G., Sara, P., & Laura, P. Beside and Behind the Wheel: Factors  
439 that Influence Driving Stress and Driving Behavior. *Sustainability (Basel,*  
440 *Switzerland)*, 2021, 13(4775), 4775-

- 441 32. Plyushteva, A. Exploring the Role of the Workplace in Experiences of Commuter  
442 Stress: A Mixed-Method Study from Sofia, Bulgaria. *Social Sciences*, 2021, 10(208),  
443 208.
- 444 33. Rezapour, M., & Richard Ferraro, F. The impact of commuters' psychological  
445 feelings due to delay on perceived quality of a rail transport. *Humanities and Social*  
446 *Sciences Communications*, 2021, 8(1), 1–8.
- 447 34. Rosida, I., Sari, D. W., & Irjayanti, A. D. The Mode Choices And Commuting Stress:  
448 Empirical Evidence From Jakarta And Denpasar. *Jurnal Pengembangan Kota*, 2019  
449 7(1), 68–76.
- 450 35. Brutus, S., Javadian, R., & Panaccio, A. J. Cycling, car, or public transit: A study of  
451 stress and mood upon arrival at work. *International Journal of Workplace Health*  
452 *Management*, 2017, 10(1), 13–24
- 453 36. Legrain, A., Eluru, N., & El-Geneidy, A. M. Am stressed, must travel: The  
454 relationship between mode choice and commuting stress. *Transportation Research*  
455 *Part F: Traffic Psychology and Behaviour*, 2015, 34, 141–151.
- 456 37. Yang, X., McCoy, E., Anaya-Boig, E., Avila-Palencia, I., Brand, C., Carrasco-  
457 Turigas, G., et al.. The effects of traveling in different transport modes on galvanic  
458 skin response (GSR) as a measure of stress: An observational study. *Environment*  
459 *International*, 2021, 156, 106764
- 460 38. Kaldis, B. The university as microcosm. *Educational Philosophy and Theory*, 2009,  
461 41(5), 553-574.
- 462 39. Struppa, D. A university is a microcosm of the country: Daniele Struppa. *Orange*  
463 *County Register*. (2021, Mar. 7). [https://www.ocregister.com/2021/03/07/a-](https://www.ocregister.com/2021/03/07/a-university-is-a-microcosm-of-the-country-daniele-struppa/)  
464 [university-is-a-microcosm-of-the-country-daniele-struppa/](https://www.ocregister.com/2021/03/07/a-university-is-a-microcosm-of-the-country-daniele-struppa/)



- 465 40. Stone AA, Neale JM, Shiftman S. Daily assessments of stress and coping and their  
466 association with mood. *Annals of Behavioral Medicine*. 1993 Mar 1;15(1):8-16
- 467 41. Maybery D, Maybery M, Bresnan R, Croft B, Graham R, Macaulay J, McQualter S,  
468 Mitchell E, Sherwell K, Szakacs E. Responding to daily event questionnaires: The  
469 influence of the order of hassle and uplift scales. *Stress and health*. 2002  
470 Feb;18(1):19-26.
- 471 42. Udayar S, Urbanaviciute I, Morselli D, Bollmann G, Rossier J, Spini D. The LIVES  
472 daily hassles scale and its relation to life satisfaction. *Assessment*. 2023  
473 Mar;30(2):348-63.
- 474 43. Lee EH. Review of the psychometric evidence of the perceived stress scale. *Asian*  
475 *Nursing Research*. 2012 Dec 1;6(4):121-7.
- 476 44. Reis RS, Hino AA, Añez CR. Perceived stress scale. *J. health Psychol*.  
477 2010;15(1):107-14.
- 478 45. Smith KJ, Emerson DJ. An assessment of the psychometric properties of the  
479 Perceived Stress Scale-10 (PSS10) with a US public accounting sample. *Advances in*  
480 *Accounting*. 2014 Dec 1;30(2):309-14.
- 481 46. Fung. Validity of the brief resilience scale and brief resilient coping scale in a Chinese  
482 sample. *International Journal of Environmental Research and Public Health*, 2020  
483 17(4), 1265–.
- 484 47. Kocalevent, Zenger, M., Hinz, A., Klapp, B., & Brähler, E. Resilient coping in the  
485 general population: Standardization of the brief resilient coping scale (BRCS). *Health*  
486 *and Quality of Life Outcomes*, 2017 15(1), 251–251
- 487 48. Sinclair, & Wallston, K. A. The Development and Psychometric Evaluation of the  
488 Brief Resilient Coping Scale. *Assessment (Odessa, Fla.)*, 2004 11(1), 94–101.

- 489 49. Ye, Wu, C.-H., Huang, T.-Y., & Yang, C.-T. . The difference between the Connor-  
490 Davidson Resilience Scale and the Brief Resilience Scale when assessing resilience:  
491 confirmatory factor analysis and predictive effects. *Global Mental Health*, 2022 9,  
492 339–346.
- 493 50. Konaszewski, Niesiobędzka, M., & Surzykiewicz, J. Validation of the Polish version  
494 of the Brief Resilience Scale (BRS). *PloS One*, 2020 15(8), e0237038–e0237038
- 495 51. Sánchez, Estrada-Hernández, N., Booth, J., & Pan, D. Factor structure, internal  
496 reliability, and construct validity of the Brief Resilience Scale (BRS): A study on  
497 persons with serious mental illness living in the community. *Psychology and*  
498 *Psychotherapy*, 2021 94(3), 620–645
- 499 52. Surzykiewicz J, Konaszewski K, Skalski S, Dobrakowski PP, Muszyńska J.  
500 Resilience and mental health in the polish population during the COVID-19  
501 lockdown: A mediation analysis. *Journal of clinical medicine*. 2021 26;10(21):4974.
- 502 53. Baer, Carmody, J., & Hunsinger, M. . Weekly Change in Mindfulness and Perceived  
503 Stress in a Mindfulness-Based Stress Reduction Program: Weekly Change in  
504 Mindfulness and Stress in MBSR. *Journal of Clinical Psychology*, 2012, 68(7), 755–  
505 765.
- 506 54. Uysal, & Çalışkan, B. B. The effects of mindfulness-based stress reduction on  
507 mindfulness and stress levels of nursing students during first clinical experience.  
508 *Perspectives in Psychiatric Care*, 2022 58(4), 2639–2645.

509

Figure 1: Distribution of symptoms experienced by respondents

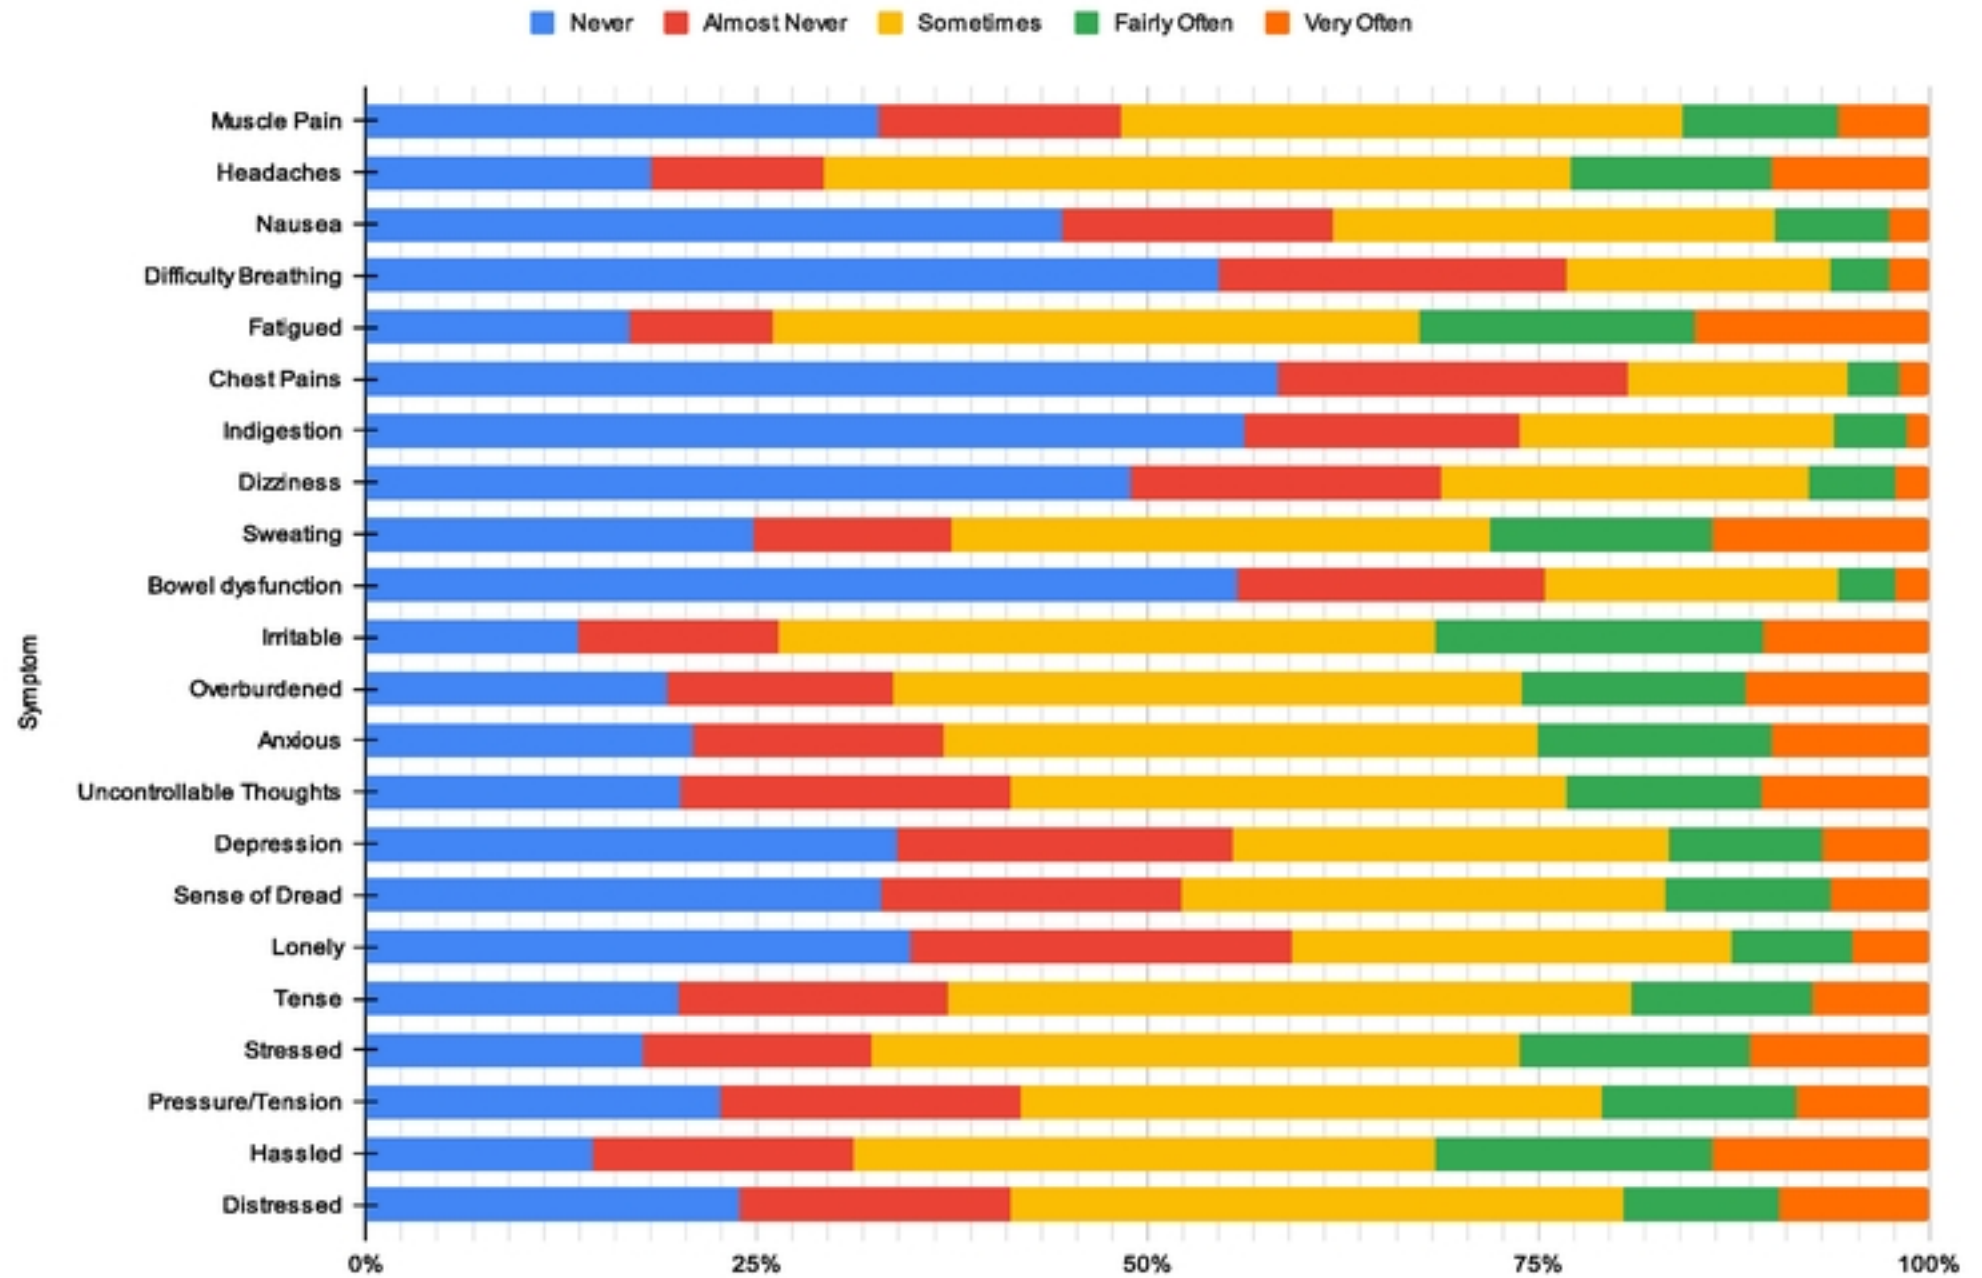

Figure 1: Distribution of symptoms experienced by respondents

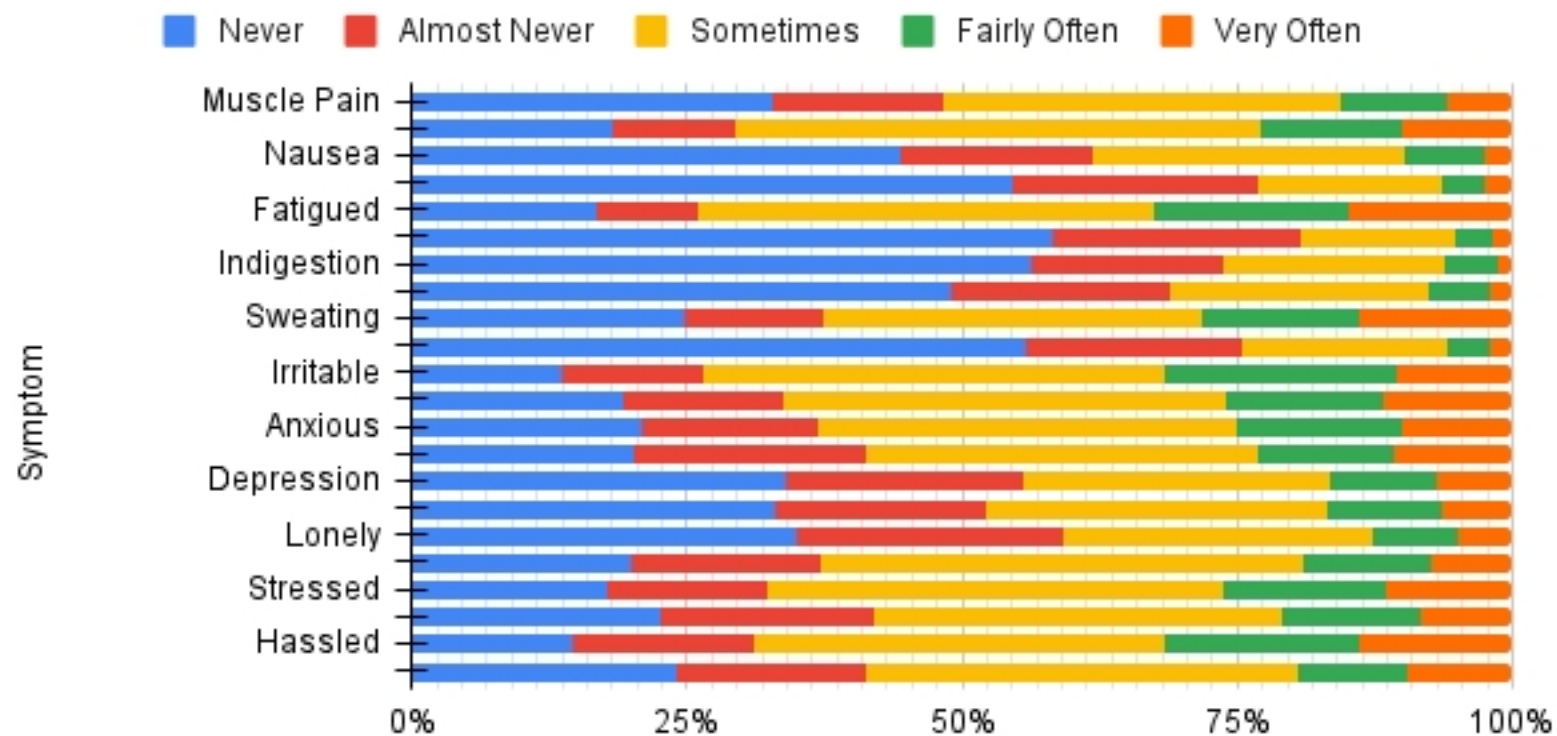

Figure
